# Supplementary material for: G9a-dependent histone methylation can be induced in G1 phase of cell cycle
Source: PubMed Central journal article supplement (PMC6354049; doi:10.1038/s41598-018-37507-5), 2019-01-30

## Supplementary Figures

**Title: G9a-dependent histone methylation can be induced in G1 phase of cell cycle**

Mikiko Fukuda<sup>1</sup>, Asako Sakaue-Sawano<sup>2</sup>, Chikako Shimura<sup>1</sup>, Makoto Tachibana<sup>3,4</sup>,  
Atsushi Miyawaki<sup>2</sup>, Yoichi Shinkai<sup>1§</sup>

<sup>1</sup>Cellular Memory Laboratory, RIKEN Cluster for Pioneering Research, 2-1 Hirosawa,  
Wako, Saitama 351-0198, Japan

<sup>2</sup>Laboratory for Cell Function Dynamics, RIKEN Center for Brain Science, 2-1 Hirosawa,  
Wako, Saitama 351-0198, Japan

<sup>3</sup>Institute of Advanced Medical Sciences, Tokushima University, 3-18-15 Kuramoto-cho,  
Tokushima 770-8503, Japan

<sup>4</sup>Experimental Research Center for Infectious Diseases, Institute for Virus Research,  
Kyoto University, 53 Shogoin, Kawara-cho, Sakyo-ku, Kyoto 606-8597, Japan

§Corresponding author, Cellular Memory Laboratory, RIKEN Cluster for Pioneering Research, 2-1 Hirosawa, Wako, Saitama 351-0198, Japan; Tel.: +81 48-467-9370; Fax: +81 48-462-4670; E-mail: yshinkai@riken.jp

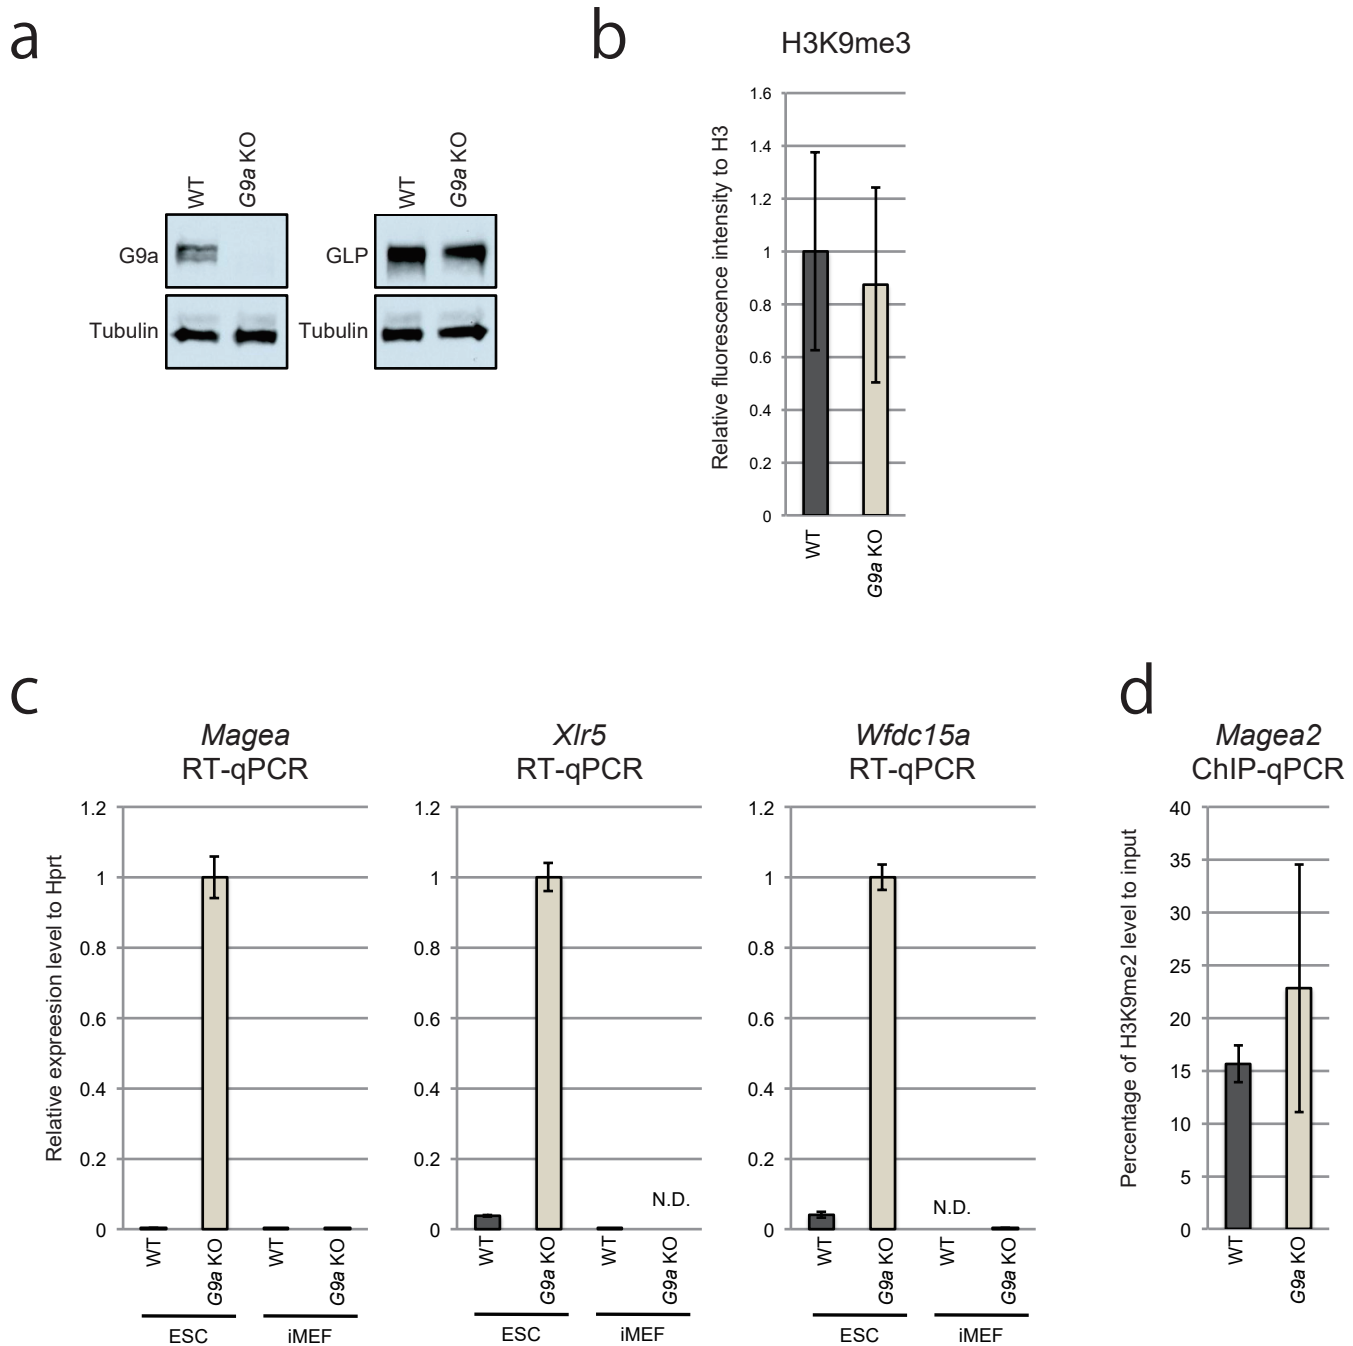

**Supplementary Figure 1. Phenotypic analysis of G9a KO iMEFs.**

a) Contents of G9a and GLP in G9a KO iMEFs were examined by western blot analysis. b) H3K9me3 level was determined by western blot using Odyssey CLs. N=5, independent experiments. c) Expression of G9a target genes, *Magea*, *Xlr5* and *Wfdc15a* were measured by quantitative RT-PCR. The mean values show the relative expression level to *Hprt*. N=3, technical replicates. N.D., not detected. d) Chip analysis for H3K9me2. Upstream of *Magea2* was measured by quantitative PCR. N=3, independent experiments. Error bars indicate  $\pm$ SD.

Exp1

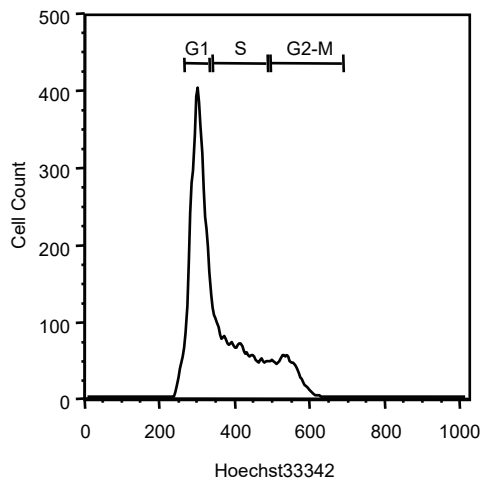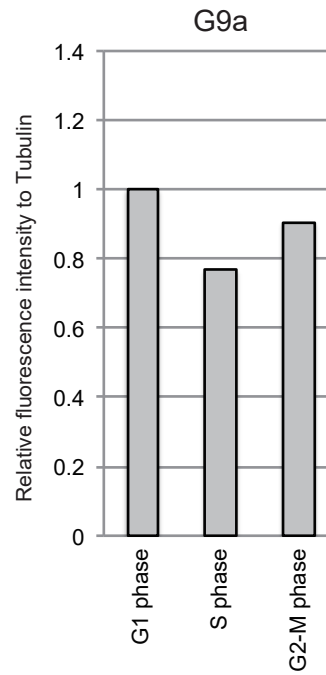

Exp2

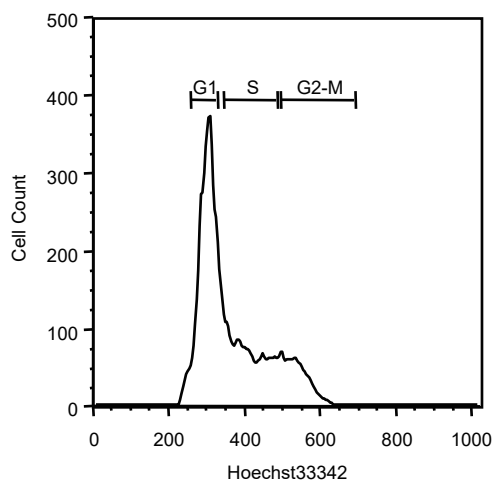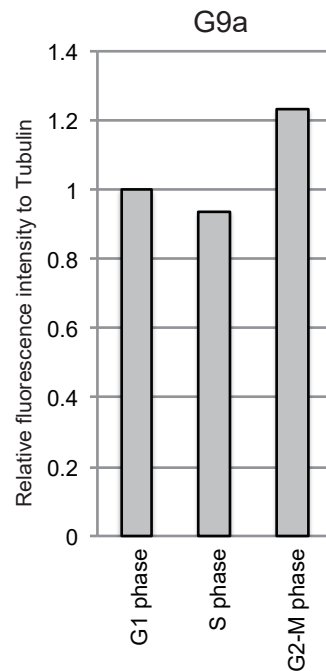

**Supplementary Figure 2. The amount of G9a protein in the cell cycle.**

The cells were stained by Hoechst33342 and sorted by FACS Aria SORP (Left). G9a was detected by western blot analysis using Odyssey CLs. The relative fluorescence intensity of G9a to Tubulin is showed in the graphs (Right). Experiments were performed 2 times.

**Fig.2f**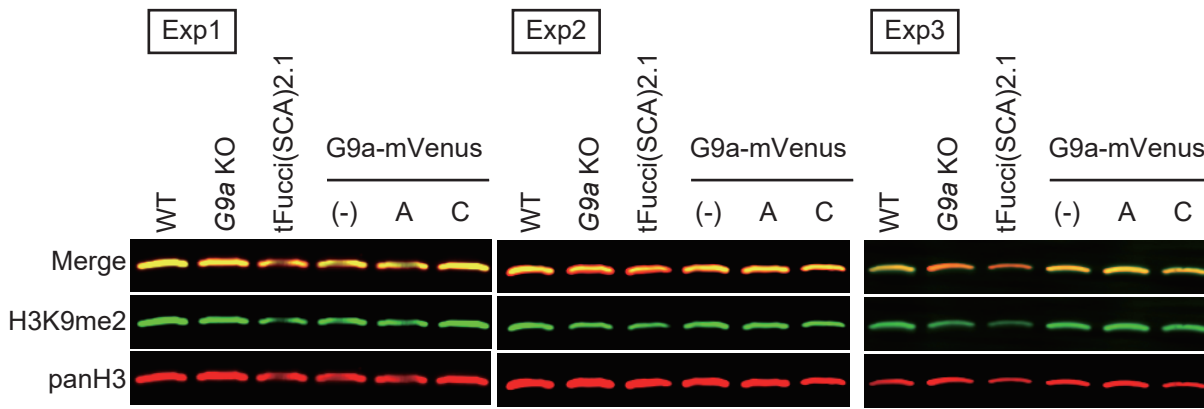**Fig.5a left**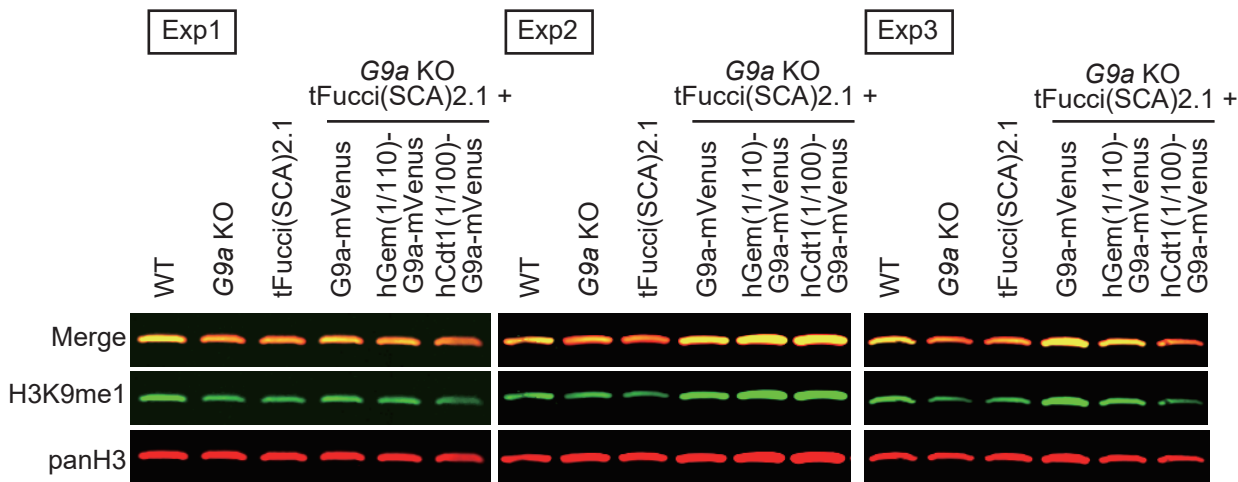**Fig.5a right**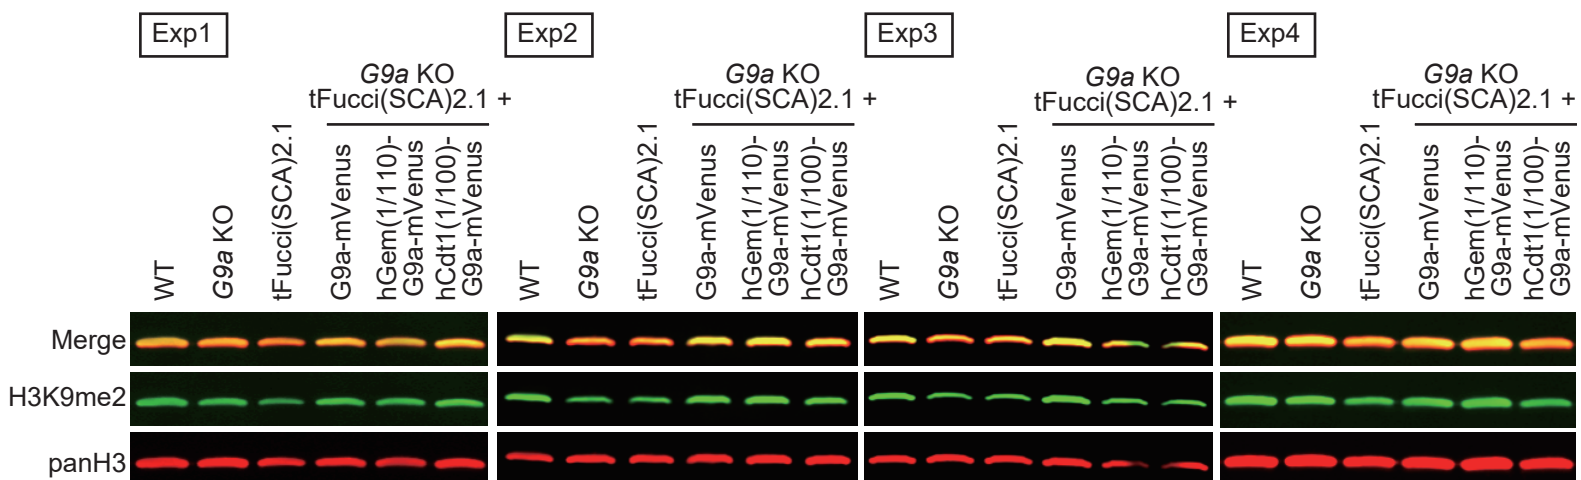**Supplementary Figure 3. Images of the immunoblotting in Fig.2f and Fig.5a.**

Histones were immunoblotted by anti-H3K9me1 or me2 and anti-H3 antibodies as primary antibodies and detected by IRDye secondary antibodies. Three (Fig.2f and Fig.5a left) and four (Fig.5a right) independent experiments were performed. Fig.2f, (-): total cells, A: AmCyan (+) sorted cells, C: mCherry (+) sorted cells.

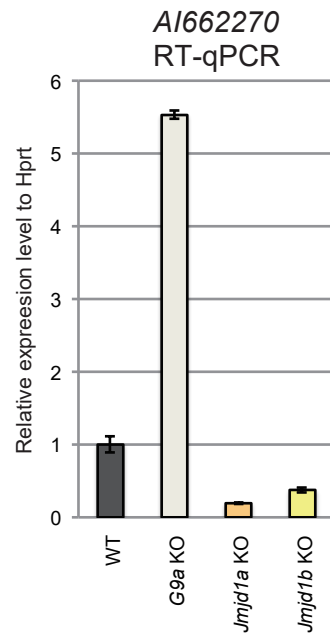

**Supplementary Figure 4. *AI662270* expression profile in WT and *G9a* KO ESCs.**

*AI662270* mRNA was measured by quantitative RT-PCR. WT: TT2, *G9a* KO: 22-10, *Jmjd1a* KO: 31-1<sup>28</sup> and *Jmjd1b* KO: D4-1<sup>27</sup>. All KO ES lines are derived from TT2.

N=3, technical replicates. Error bars indicate  $\pm$ SD.

**Fig.S1b**

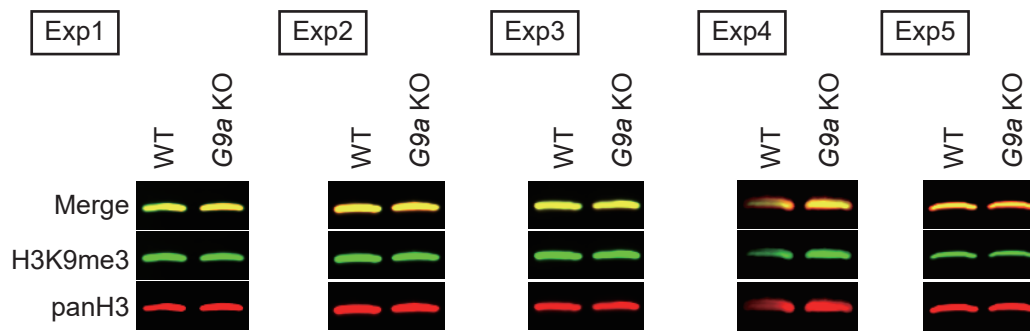

**Fig.S2 right**

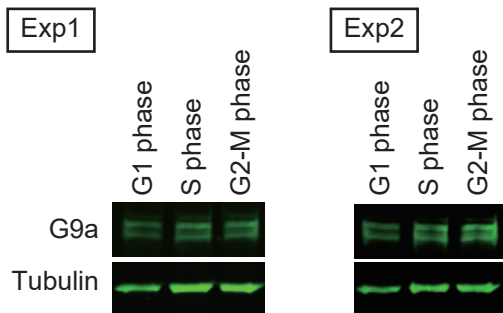

**Supplementary Figure 5. Images of the immunoblotting used in Fig.S1b and Fig.S2.**

Histones were immunoblotted by anti-H3K9me3 and anti-H3 antibodies (Fig.S1b) and G9a and Tubulin were immunoblotted (Fig.S2) as primary antibodies and detected by IRDye secondary antibodies. Five (Fig.S1b) and two (Fig.S2) independent experiments were performed.

**Fig.2e**

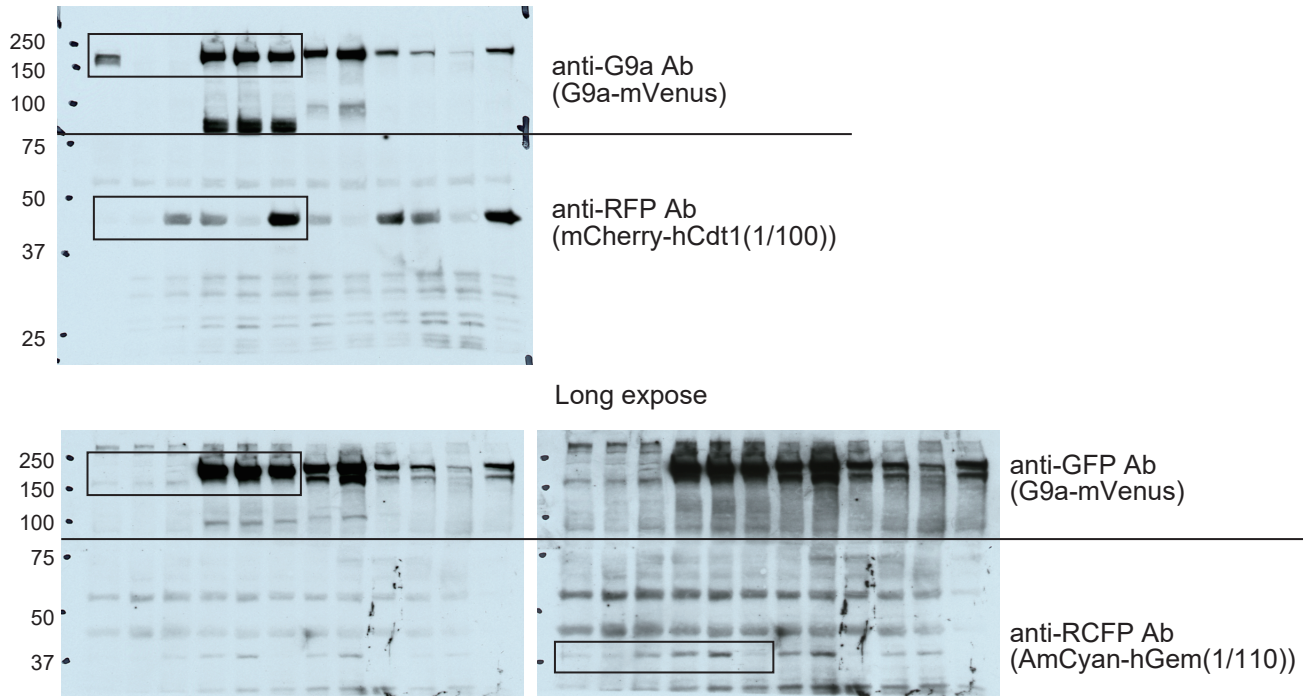

**Fig.4e**

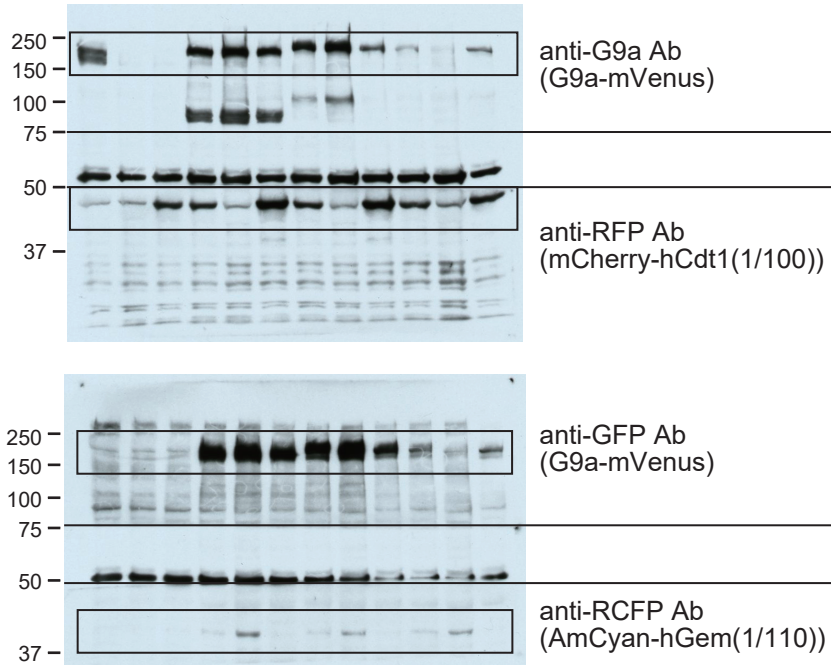

**Fig.S1a**

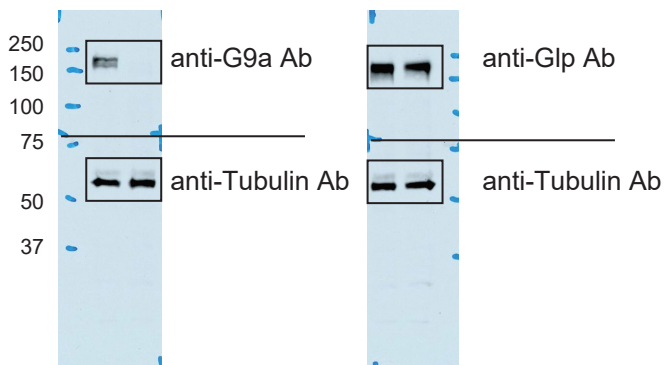

**Supplementary Figure 6. Uncropped images of the immunoblotting in Fig.2e, Fig.4e, Fig.S1a, Fig.S3 and Fig.S5.**

Each graph picked selection area.

**Fig.S3 (Fig.2f)**

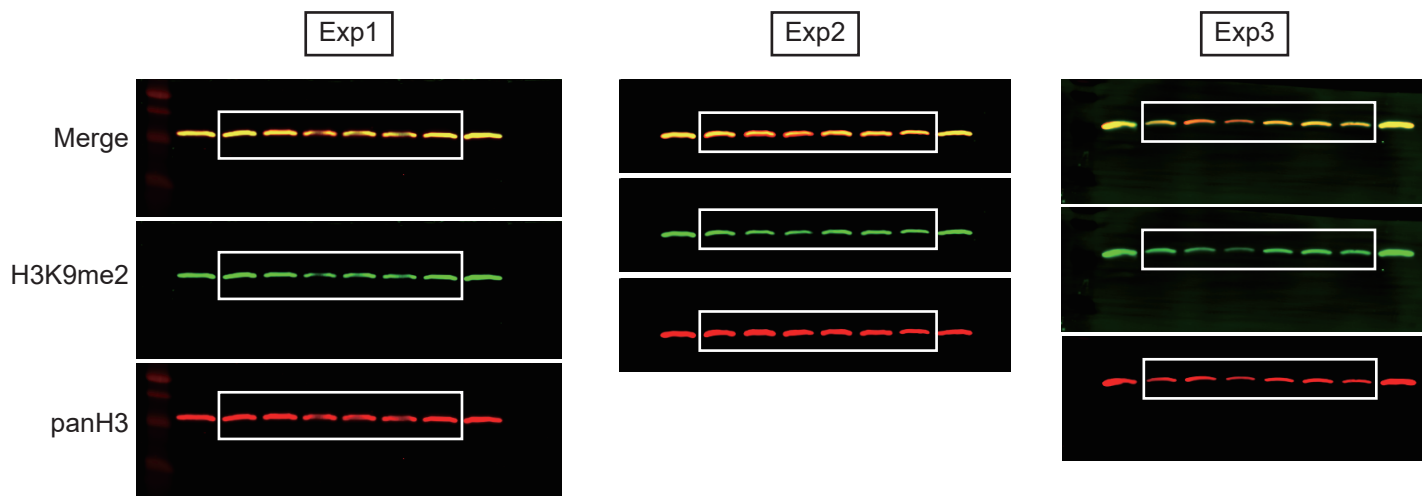

**Fig.S3 (Fig.5a left)**

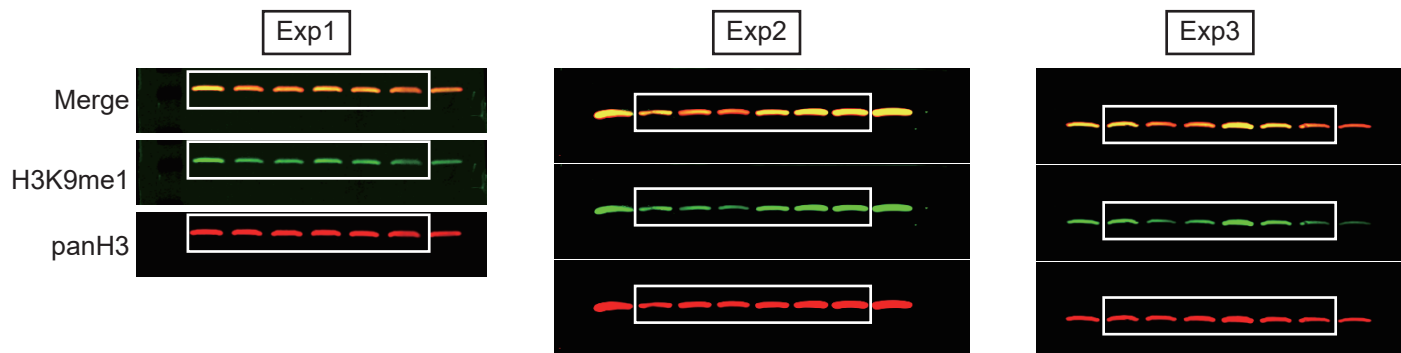

**Fig.S3 (Fig.5a Right)**

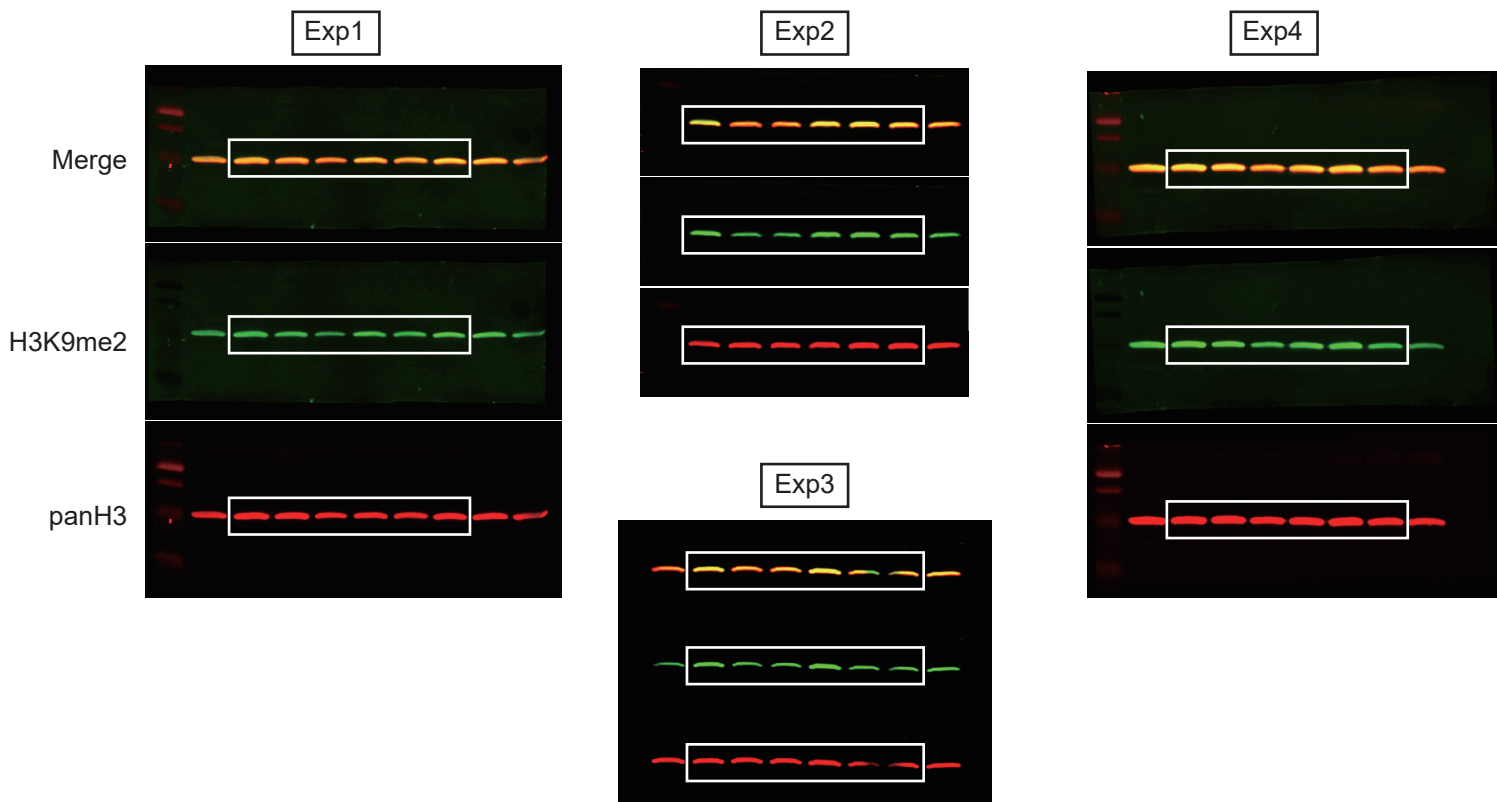



**Fig.S5 (Fig.S1b)**

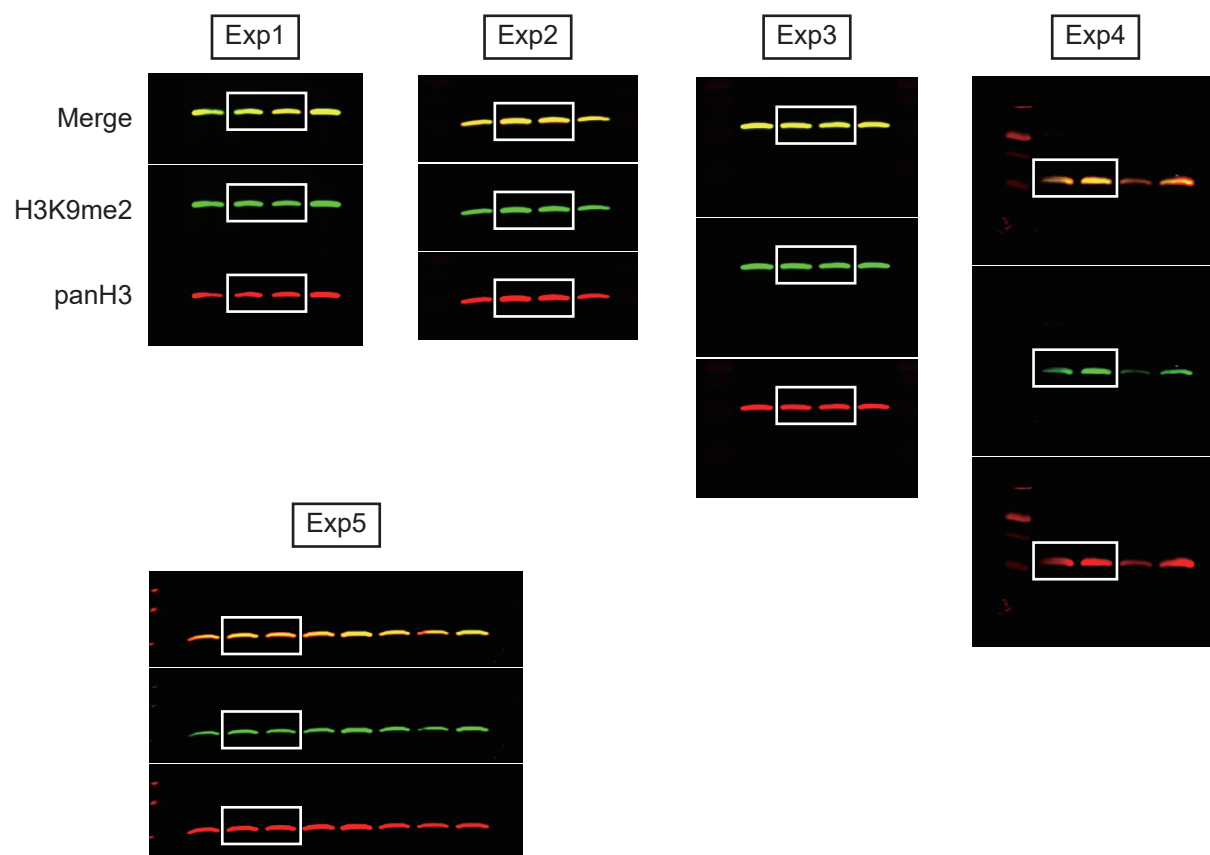

**Fig.S5 (Fig.S2 Right)**

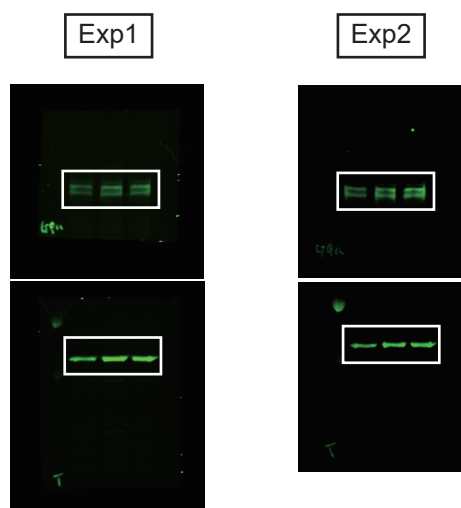

Supplement: 41598_2018_37507_MOESM1_ESM.pdf [file 41598_2018_37507_MOESM1_ESM.pdf]
